# Supplementary material for: Clinical exome sequencing as the first-tier test for diagnosing developmental disorders covering both CNV and SNV: a Chinese cohort
Source: HighWire-hosted journal article supplement (doi:10.1136/jmedgenet-2019-106377), 2020-01-31
Supplement: jmedgenet-2019-106377supp009_data_supplement.pdf [file jmedgenet-2019-106377supp009_data_supplement.pdf]

**Supplementary Table S5. Behavioural-trouble-related CNVs annotated by DECIPHER are covered by CES.**

| Syndrome                          | Flag      | Phenotype                                                                                                                                                          | Status | Location (hg19)       | Size (Mb) | Cytoband | Key Gene           |
|-----------------------------------|-----------|--------------------------------------------------------------------------------------------------------------------------------------------------------------------|--------|-----------------------|-----------|----------|--------------------|
| 1q21.1 recurrent microduplication | suspected | Autism, Intellectual disability                                                                                                                                    | DUP    | 1:146533376-147883376 | 1.35      | 1q21.1   | <i>GJA8</i>        |
| 2q33.1 deletion syndrome          | confirmed | Behavioural/Psychiatric Abnormality, Cleft palate, Feeding difficulties in infancy, High palate, Inguinal hernia, Intellectual disability, Seizures, Short stature | DEL    | 2:196925121-205206939 | 8.28      | 2q33.1   | <i>SATB2</i>       |
| Williams-Beuren Syndrome (WBS)    | confirmed | Aortic valve stenosis, Everted lower lip vermilion, Intellectual disability, Malar flattening, Microdontia, Short attention span, Short stature                    | DEL    | 7:72744455-74142672   | 1.4       | 7q11.23  | <i>ELN</i>         |
| 7q11.23 duplication syndrome      | confirmed | Delayed speech and language development, Intellectual disability, Short attention span                                                                             | DUP    | 7:72744455-74142672   | 1.4       | 7q11.23  | <i>ELN</i>         |
| 8p23.1 duplication syndrome       | confirmed | Abnormal facial shape, Behavioural/Psychiatric Abnormality, Delayed speech and language development, Intellectual disability, Malformation of the heart and        | DUP    | 8:8100055-11764629    | 3.66      | 8p23.1   | <i>SOX7, GATA4</i> |

|                                                              |           |                                                                                                                                                                                                      |     |                          |       |                   |                                                   |
|--------------------------------------------------------------|-----------|------------------------------------------------------------------------------------------------------------------------------------------------------------------------------------------------------|-----|--------------------------|-------|-------------------|---------------------------------------------------|
| 16p11.2-p12.2<br>microduplication<br>syndrome                | confirmed | great vessels<br>Abnormal facial shape,<br>Autism, Global developmental<br>delay, Intellectual disability,<br>Microcephaly, Short Stature<br>Brachydactyly syndrome,<br>Hoarse voice, Hyperactivity, | DUP | 16:21475060-<br>29284077 | 7.81  | 16p11.2-<br>p12.2 | <i>PLK1</i>                                       |
| Smith-Magenis<br>Syndrome                                    | confirmed | Intellectual disability,<br>Muscular hypotonia, Self-<br>mutilation, Short stature, Sleep<br>disturbance, Stereotypic<br>behavior                                                                    | DEL | 17:16773072-<br>20222149 | 3.7   | 17p11.2           | <i>ALDH3A2</i> ,<br><i>RAI1</i> ,<br><i>TOP3A</i> |
| Potocki-Lupski<br>syndrome (17p11.2<br>duplication syndrome) | confirmed | Autism, Hyperactivity, Short<br>attention span, Short stature                                                                                                                                        | DUP | 17:16773072-<br>20222149 | 3.45  | 17p11.2           | <i>ALDH3A2</i> ,<br><i>RAI1</i> ,<br><i>TOP3A</i> |
| 22q13 deletion<br>syndrome (Phelan-<br>Mcdermid syndrome)    | confirmed | Autism, Delayed speech and<br>language development,<br>Hyperactivity, Intellectual<br>disability, Muscular hypotonia                                                                                 | DEL | 22:51045516-<br>51187844 | 0.142 | 22q12             | <i>SHANK3</i>                                     |
